# Supplementary material
Source: PubMed Central journal article supplement (PMC8018700)
Supplement: mmc1.pdf [file mmc1.pdf]

La Rosa et al. "Rapid screening for SARS-CoV-2 variants of concern in clinical and environmental samples using nested RT-PCR assays targeting key mutations of the Spike protein"

**Study in GISAID on the predictive capacity of specific mutations for the identification of SARS-CoV-2 variants**

**VOC 202012/01 ("UK variant") - GISAID 20I/501Y.V1 - clade GR, lineage B.1.1.7**

|                                                   |                          |        |     |  |  |
|---------------------------------------------------|--------------------------|--------|-----|--|--|
| Last run:                                         | 14.01.2021 h 23.30-23.40 |        |     |  |  |
| tot GISAID CoV-2 complete genome seq              |                          | 371470 |     |  |  |
| tot GR B.1.1.7 complete genome seq                |                          | 17798  | "y" |  |  |
| tot VUI202012/01 complete genome seq              |                          | 17356  | "z" |  |  |
| tot GR B.1.1.7 + VUI202012/01 complete genome seq |                          | 17312  |     |  |  |
|                                                   |                          |        |     |  |  |
|                                                   |                          |        |     |  |  |

**Number of complete genomes classified as GR B.1.1.7 that display the following combinations of mutations**

| H69del | Y145del | N501Y | A570D | n°    | n°/y    | n°/z    |
|--------|---------|-------|-------|-------|---------|---------|
| 1      | 1       | 1     | 1     | 17353 | 97,50%  | 99,98%  |
| 1      | 1       | 1     | 0     | 17355 | 97,51%  | 99,99%  |
| 0      | 1       | 1     | 1     | 17372 | 97,61%  | 100,09% |
| 1      | 0       | 1     | 1     | 17510 | 98,38%  | 100,89% |
| 1      | 1       | 0     | 1     | 17371 | 97,60%  | 100,09% |
| 1      | 1       | 0     | 0     | 17374 | 97,62%  | 100,10% |
| 0      | 0       | 1     | 1     | 17691 | 99,40%  | 101,93% |
| 1      | 0       | 0     | 1     | 17529 | 98,49%  | 101,00% |
| 0      | 1       | 1     | 0     | 17374 | 97,62%  | 100,10% |
| 1      | 0       | 1     | 0     | 17517 | 98,42%  | 100,93% |
| 0      | 1       | 0     | 1     | 17390 | 97,71%  | 100,20% |
| 1      | 0       | 0     | 0     | 17537 | 98,53%  | 101,04% |
| 0      | 1       | 0     | 0     | 17393 | 97,72%  | 100,21% |
| 0      | 0       | 1     | 0     | 17703 | 99,47%  | 102,00% |
| 0      | 0       | 0     | 1     | 17829 | 100,17% | 102,73% |
| 0      | 0       | 0     | 0     | 17798 | 100,00% | 102,55% |

**Number of complete genomes with the following combinations of mutations that are classified as GR B.1.1.7**

| H69del | Y145del | N501Y | A570D | n°    | GR B.1.1.7 | GR B.1.1.7/n° | n°/y    | n°/z    |
|--------|---------|-------|-------|-------|------------|---------------|---------|---------|
| 1      | 1       | 1     | 1     | 17355 | 17355      | 100,00%       | 97,51%  | 99,99%  |
| 1      | 1       | 1     | 0     | 17357 | 17357      | 100,00%       | 97,52%  | 100,01% |
| 0      | 1       | 1     | 1     | 17374 | 17374      | 100,00%       | 97,62%  | 100,10% |
| 1      | 0       | 1     | 1     | 17512 | 17512      | 100,00%       | 98,39%  | 100,90% |
| 1      | 1       | 0     | 1     | 17373 | 17373      | 100,00%       | 97,61%  | 100,10% |
| 1      | 1       | 0     | 0     | 17376 | 17376      | 100,00%       | 97,63%  | 100,12% |
| 0      | 0       | 1     | 1     | 17693 | 17693      | 100,00%       | 99,41%  | 101,94% |
| 1      | 0       | 0     | 1     | 17531 | 17531      | 100,00%       | 98,50%  | 101,01% |
| 0      | 1       | 1     | 0     | 17376 | 17376      | 100,00%       | 97,63%  | 100,12% |
| 1      | 0       | 1     | 0     | 17519 | 17519      | 100,00%       | 98,43%  | 100,94% |
| 0      | 1       | 0     | 1     | 17392 | 17392      | 100,00%       | 97,72%  | 100,21% |
| 1      | 0       | 0     | 0     | 24166 | 17537      | 72,57%        | 135,78% | 139,24% |
| 0      | 1       | 0     | 0     | 17908 | 17395      | 97,14%        | 100,62% | 103,18% |
| 0      | 0       | 1     | 0     | 18751 | 17705      | 94,42%        | 105,35% | 108,04% |
| 0      | 0       | 0     | 1     | 17833 | 17831      | 99,99%        | 100,20% | 102,75% |
| 0      | 0       | 0     | 0     | 17798 | 17798      | 100,00%       | 100,00% | 102,55% |

Y145del corresponds to Y144del

La Rosa et al. "Rapid screening for SARS-CoV-2 variants of concern in clinical and environmental samples using nested RT-PCR assays targeting key mutations of the Spike protein"

**VOC 202012/02 ("South Africa") - GISAID 20H/501Y.V2 - clade GR, lineage B.1.351**

|                                                                                                                  |                          |              |                |           |                   |                      |             |             |  |
|------------------------------------------------------------------------------------------------------------------|--------------------------|--------------|----------------|-----------|-------------------|----------------------|-------------|-------------|--|
| Last run:                                                                                                        | 17.01.2021 h 19.45-23.05 |              |                |           |                   |                      |             |             |  |
| tot GISAID CoV-2 complete genome seq                                                                             |                          |              |                | 379322    |                   |                      |             |             |  |
| tot GH B.1.351 complete genome seq                                                                               |                          |              |                | 533       | "y"               |                      |             |             |  |
| tot 501Y.V2 complete genome seq                                                                                  |                          |              |                | 474       | "z"               |                      |             |             |  |
| tot GH B.1.351 + 501Y.V2 complete genome seq                                                                     |                          |              |                | 471       |                   |                      |             |             |  |
|                                                                                                                  |                          |              |                |           |                   |                      |             |             |  |
|                                                                                                                  |                          |              |                |           |                   |                      |             |             |  |
| <b>Number of complete genomes classified as GH B.1.351 that display the following combinations of mutations</b>  |                          |              |                |           |                   |                      |             |             |  |
| <b>D80A</b>                                                                                                      | <b>E484K</b>             | <b>N501Y</b> | <b>L242del</b> | <b>n°</b> |                   |                      | <b>n°/y</b> | <b>n°/z</b> |  |
| 1                                                                                                                | 1                        | 1            | 1              | 436       |                   |                      | 81,80%      | 91,98%      |  |
| 1                                                                                                                | 1                        | 1            | 0              | 446       |                   |                      | 83,68%      | 94,09%      |  |
| 0                                                                                                                | 1                        | 1            | 1              | 445       |                   |                      | 83,49%      | 93,88%      |  |
| 1                                                                                                                | 0                        | 1            | 1              | 440       |                   |                      | 82,55%      | 92,83%      |  |
| 1                                                                                                                | 1                        | 0            | 1              | 444       |                   |                      | 83,30%      | 93,67%      |  |
| 1                                                                                                                | 1                        | 0            | 0              | 455       |                   |                      | 85,37%      | 95,99%      |  |
| 0                                                                                                                | 0                        | 1            | 1              | 449       |                   |                      | 84,24%      | 94,73%      |  |
| 1                                                                                                                | 0                        | 0            | 1              | 460       |                   |                      | 86,30%      | 97,05%      |  |
| 0                                                                                                                | 1                        | 1            | 0              | 477       |                   |                      | 89,49%      | 100,63%     |  |
| 1                                                                                                                | 0                        | 1            | 0              | 450       |                   |                      | 84,43%      | 94,94%      |  |
| 0                                                                                                                | 1                        | 0            | 1              | 453       |                   |                      | 84,99%      | 95,57%      |  |
| 1                                                                                                                | 0                        | 0            | 0              | 472       |                   |                      | 88,56%      | 99,58%      |  |
| 0                                                                                                                | 1                        | 0            | 0              | 487       |                   |                      | 91,37%      | 102,74%     |  |
| 0                                                                                                                | 0                        | 1            | 0              | 483       |                   |                      | 90,62%      | 101,90%     |  |
| 0                                                                                                                | 0                        | 0            | 1              | 472       |                   |                      | 88,56%      | 99,58%      |  |
| 0                                                                                                                | 0                        | 0            | 0              | 533       |                   |                      | 100,00%     | 112,45%     |  |
|                                                                                                                  |                          |              |                |           |                   |                      |             |             |  |
| <b>Number of complete genomes with the following combinations of mutations that are classified as GH B.1.351</b> |                          |              |                |           |                   |                      |             |             |  |
| <b>D80A</b>                                                                                                      | <b>E484K</b>             | <b>N501Y</b> | <b>L242del</b> | <b>n°</b> | <b>GH B.1.351</b> | <b>GH B.1.351/n°</b> | <b>n°/y</b> | <b>n°/z</b> |  |
| 1                                                                                                                | 1                        | 1            | 1              | 439       | 436               | 99,32%               | 82,36%      | 92,62%      |  |
| 1                                                                                                                | 1                        | 1            | 0              | 449       | 446               | 99,33%               | 84,24%      | 94,73%      |  |
| 0                                                                                                                | 1                        | 1            | 1              | 448       | 445               | 99,33%               | 84,05%      | 94,51%      |  |
| 1                                                                                                                | 0                        | 1            | 1              | 443       | 440               | 99,32%               | 83,11%      | 93,46%      |  |
| 1                                                                                                                | 1                        | 0            | 1              | 447       | 444               | 99,33%               | 83,86%      | 94,30%      |  |
| 1                                                                                                                | 1                        | 0            | 0              | 458       | 455               | 99,34%               | 85,93%      | 96,62%      |  |
| 0                                                                                                                | 0                        | 1            | 1              | 452       | 449               | 99,34%               | 84,80%      | 95,36%      |  |
| 1                                                                                                                | 0                        | 0            | 1              | 463       | 460               | 99,35%               | 86,87%      | 97,68%      |  |
| 0                                                                                                                | 1                        | 1            | 0              | 493       | 477               | 96,75%               | 92,50%      | 104,01%     |  |
| 1                                                                                                                | 0                        | 1            | 0              | 453       | 450               | 99,34%               | 84,99%      | 95,57%      |  |
| 0                                                                                                                | 1                        | 0            | 1              | 456       | 453               | 99,34%               | 85,55%      | 96,20%      |  |
| 1                                                                                                                | 0                        | 0            | 0              | 498       | 472               | 94,78%               | 93,43%      | 105,06%     |  |
| 0                                                                                                                | 1                        | 0            | 0              | 761       | 487               | 63,99%               | 142,78%     | 160,55%     |  |
| 0                                                                                                                | 0                        | 1            | 0              | 19034     | 483               | 2,54%                | 3571,11%    | 4015,61%    |  |
| 0                                                                                                                | 0                        | 0            | 1              | 510       | 472               | 92,55%               | 95,68%      | 107,59%     |  |
| 0                                                                                                                | 0                        | 0            | 0              | 533       | 533               | 100,00%              | 100,00%     | 112,45%     |  |
|                                                                                                                  |                          |              |                |           |                   |                      |             |             |  |
|                                                                                                                  |                          |              |                |           |                   |                      |             |             |  |
| <b>Y145del</b>                                                                                                   | corresponds to Y144del   |              |                |           |                   |                      |             |             |  |

La Rosa et al. “Rapid screening for SARS-CoV-2 variants of concern in clinical and environmental samples using nested RT-PCR assays targeting key mutations of the Spike protein”

**Confirmation of the discriminatory capacity of the PCR ID 980 in Nextclade (<https://clades.nextstrain.org/>)**

Sequences (full genome or partial Spike gene sequence included in PCR ID 980) used for the study

| Clade                                  | GISAID sequence ID                                                         | Nextclade   |             |
|----------------------------------------|----------------------------------------------------------------------------|-------------|-------------|
|                                        |                                                                            | Full genome | PCR 980     |
| 20I/501Y.V1<br>(UK variant)            | hCoV-19/Denmark/DCGC-23017/2020 EPI ISL 793399 2020-12-28                  | 20I/501Y.V1 | 20B         |
|                                        | hCoV-19/Portugal/PT2159/2021 EPI ISL 801520 2021-01-02                     |             |             |
|                                        | hCoV-19/Norway/7072/2020 EPI ISL 813977 2020-12-21                         |             |             |
|                                        | hCoV-19/Netherlands/NH-RIVM-21371/2020 EPI ISL 826536 2020-12-28           |             |             |
|                                        | hCoV-19/England/205390794/2021 EPI ISL 846595 2021-01-02                   |             |             |
| 20H/501Y.V2<br>(South African variant) | hCoV-19/South Africa/KRISP-EC-K005341/2020 EPI ISL 678626 2020-11-12       | 20H/501Y.V2 | 20H/501Y.V2 |
|                                        | hCoV-19/South Africa/NHLS-UCT-GS-2090-KRISP/2020 EPI ISL 696452 2020-11-19 |             |             |
|                                        | hCoV-19/South Africa/NHLS-UCT-GS-3558-KRISP/2020 EPI ISL 696459 2020-11-20 |             |             |
|                                        | hCoV-19/South Africa/NHLS-UCT-GS-7043-KRISP/2020 EPI ISL 696494 2020-11-24 |             |             |
|                                        | hCoV-19/South Africa/KRISP-K007135/2020 EPI ISL 825130 2020-11-24          |             |             |
| 20J/501Y.V3<br>(Brazilian variant)     | hCoV-19/Brazil/AM-20843269RC/2020 EPI ISL 833140 2020-12-23                | 20J/501Y.V3 | 20J/501Y.V3 |
|                                        | hCoV-19/Japan/IC-0562/2021 EPI ISL 792681 2021-01-02                       |             |             |
|                                        | hCoV-19/Brazil/AM-994/2020 EPI ISL 833174 2020-12-22                       |             |             |
|                                        | hCoV-19/Japan/TY7-501/2021 EPI ISL 833366 2021-01                          |             |             |
|                                        | hCoV-19/South Korea/KDCA0464/2021 EPI ISL 833249 2021-01-10                |             |             |
| 20E.EU1<br>(Spanish variant)           | hCoV-19/Ireland/WW-NVRL-AIIDV1206v1/2020 EPI ISL 768773 2020-09-25         | 20E (EU1)   | 20E (EU1)   |
|                                        | hCoV-19/Spain/CT-IBV-97012007/2020 EPI ISL 855493 2020-09-18               |             |             |
|                                        | hCoV-19/Italy/CAM-COTUGNO-11204/2020 EPI ISL 855573 2020-12-21             |             |             |
|                                        | hCoV-19/Denmark/DCGC-32260/2020 EPI ISL 856676 2020-12-07                  |             |             |
|                                        | hCoV-19/Belgium/ULG-11309/2021 EPI ISL 856753 2021-01-13                   |             |             |
| CAL 20C                                | hCoV-19/USA/NM-CDC-2-3768096/2021 EPI_ISL_903839 2021-01-02                | 20C         | 20C         |
|                                        | hCoV-19/USA/CT-CDC-2-3774026/2020 EPI_ISL_903921 2020-12-03                |             |             |

La Rosa et al. “Rapid screening for SARS-CoV-2 variants of concern in clinical and environmental samples using nested RT-PCR assays targeting key mutations of the Spike protein”

|                                |                                                              |     |     |
|--------------------------------|--------------------------------------------------------------|-----|-----|
| (variant common in California) | hCoV-19/USA/CA-CDC-2-3774040/2020 EPI_ISL_903892 2020-12-31  |     |     |
|                                | hCoV-19/USA/CA-LACPHL-AF00262/2021 EPI_ISL_905771 2021-01-10 |     |     |
|                                | hCoV-19/USA/WA-OHSU-9371/2021 EPI_ISL_906034 2021-01-07      |     |     |
| 19A<br>(Wuhan strain)          | hCoV-19/Italy/FVG-ISS-2249/2020 EPI_ISL_856893 2020-03-01    |     |     |
|                                | hCoV-19/Ireland/D-20G41967/2020 EPI_ISL_848165 2020-03-26    |     |     |
|                                | hCoV-19/USA/NY-AECOM_075/2020 EPI_ISL_826638 2020-04-07      | 19A | 19A |
|                                | hCoV-19/Italy/LAZ-INMI-SPL1/2020 EPI_ISL_412974 2020-01-29   |     |     |
|                                | hCoV-19/Italy/LOM-UniMI-L228/2020 EPI_ISL_542215 2020-03-11  |     |     |

La Rosa et al. "Rapid screening for SARS-CoV-2 variants of concern in clinical and environmental samples using nested RT-PCR assays targeting key mutations of the Spike protein"

**Field samples details**

**Clinical samples**

| Clinical sample ID | Source swab ID | Sampling date | GeneFinder™ Covid-19 Plus RealAmp Kit |        | La Rosa et al., 2021 nsp14 region |          |
|--------------------|----------------|---------------|---------------------------------------|--------|-----------------------------------|----------|
|                    |                |               | RdRp gene                             | N gene | Ct                                | g.c./μL  |
|                    |                |               | Ct                                    | Ct     |                                   |          |
| swab_1             | 38846          | 23/11/2020    | 21,1                                  | 21,2   | 20,30                             | 1,91E+05 |
| swab_2             | 41038          | 28/11/2020    | 26,0                                  | 23,8   | 20,70                             | 1,46E+05 |
| swab_3             | 41056          | 28/11/2020    | 20,1                                  | 20,5   | 18,87                             | 4,95E+05 |
| swab_4             | 41057          | 28/11/2020    | 19,7                                  | 19,1   | 18,83                             | 5,07E+05 |
| swab_5             | 48413          | 31/12/2020    | 19,9                                  | 19,9   | 19,54                             | 3,17E+05 |
| swab_6             | 48423          | 31/12/2020    | 20,1                                  | 20,0   | 19,14                             | 4,11E+05 |
| swab_7             | 48432          | 31/12/2020    | 18,3                                  | 17,7   | 17,71                             | 1,07E+06 |
| swab_8             | 48446          | 31/12/2020    | 20,6                                  | 20,1   | 19,40                             | 3,46E+05 |
| swab_9             | 51287          | 18/01/2021    | 21,6                                  | 19,6   | 20,24                             | 1,98E+05 |
| swab_10            | 51289          | 18/01/2021    | 23,5                                  | 22,7   | 22,17                             | 5,48E+04 |
| swab_11            | 51291          | 18/01/2021    | 25,8                                  | 25,5   | 25,57                             | 5,69E+03 |
| swab_12            | 51304          | 18/01/2021    | 21,1                                  | 19,8   | 20,85                             | 1,32E+05 |
| swab_13            | 38850          | 23/11/2020    | 29,1                                  | 28,9   | 28,25                             | 9,52E+02 |
| swab_14            | 38892          | 23/11/2020    | 30,8                                  | 30,3   | 30,13                             | 2,72E+02 |
| swab_15            | 38904          | 23/11/2020    | 31,2                                  | 30,3   | 30,76                             | 1,80E+02 |
| swab_16            | 40983          | 28/11/2020    | 24,3                                  | 24,7   | 23,27                             | 2,63E+04 |
| swab_17            | 48326          | 31/12/2020    | 32,4                                  | 31,2   | 31,94                             | 8,15E+01 |
| swab_18            | 48330          | 31/12/2020    | 29,3                                  | 28,2   | 30,06                             | 2,85E+02 |
| swab_19            | 48458          | 31/12/2020    | 30,5                                  | 29,8   | 29,96                             | 3,05E+02 |
| swab_20            | 48465          | 31/12/2020    | 30,7                                  | 30,0   | 29,73                             | 3,57E+02 |
| swab_21            | 51260          | 18/01/2021    | 34,5                                  | 31,5   | 33,33                             | 3,22E+01 |
| swab_22            | 51267          | 18/01/2021    | 33,4                                  | 31,7   | 32,15                             | 7,12E+01 |
| swab_23            | 51280          | 18/01/2021    | 34,4                                  | 31,6   | 32,37                             | 6,14E+01 |
| swab_24            | 51296          | 18/01/2021    | 33,6                                  | 31,3   | 31,34                             | 1,22E+02 |

| Clinical sample ID | Source culture ID | Sampling date | GeneFinder™ Covid-19 Plus RealAmp Kit |        | La Rosa et al., 2021 nsp14 region |          |
|--------------------|-------------------|---------------|---------------------------------------|--------|-----------------------------------|----------|
|                    |                   |               | RdRp gene                             | N gene | Ct                                | g.c./μL  |
|                    |                   |               | Ct                                    | Ct     |                                   |          |
| swab_25            | 407               | 24/12/2020    | 15,6                                  | 15,6   | 13,17                             | 2,21E+07 |
| swab_26            | 414               | 24/12/2020    | 16,5                                  | 15,8   | 14,11                             | 1,18E+07 |
| swab_27            | 170               | 25/08/2020    | 14,4                                  | 14,4   | 10,85                             | 1,03E+08 |
| swab_28            | 172               | 25/08/2020    | 16,1                                  | 17,0   | 15,03                             | 6,37E+06 |
| swab_29            | 413               | 24/12/2020    | 14,3                                  | 14,4   | 10,46                             | 1,34E+08 |
| swab_30            | 423               | 30/12/2020    | 14,6                                  | 14,6   | 11,02                             | 9,24E+07 |
| swab_31            | 399               | 24/12/2020    | 16,2                                  | 14,9   | 13,10                             | 1,74E+07 |

La Rosa et al. “Rapid screening for SARS-CoV-2 variants of concern in clinical and environmental samples using nested RT-PCR assays targeting key mutations of the Spike protein”

| <b>Clinical sample ID</b> | <b>GISAID sequence ID</b>                                     | <b>GISAID identification based on WGS</b> | <b>Nextstrain identification based on WGS</b> |
|---------------------------|---------------------------------------------------------------|-------------------------------------------|-----------------------------------------------|
| swab_25                   | hCoV-19/Italy/APU-IZSPB 407PT/2020 EPI ISL 794749 2020-11-25  | G B.1                                     | 20A                                           |
| swab_26                   | hCoV-19/Italy/APU-IZSPB 414PT/2020 EPI ISL 794755 2020-11-25  | G B.1                                     | 20A                                           |
| swab_27                   | hCoV-19/Italy/APU-IZSPB-170APT/2020 EPI ISL 649190 2020-08-17 | GR B.1.1.316                              | 20B                                           |
| swab_28                   | hCoV-19/Italy/APU-IZSPB-172APT/2020 EPI ISL 649191 2020-08-20 | GR B.1.1.229                              | 20B                                           |
| swab_29                   | hCoV-19/Italy/APU-IZSPB 413PT/2020 EPI ISL 794754 2020-12-16  | GV B.1.177                                | 20E EU1                                       |
| swab_30                   | hCoV-19/Italy/APU-IZSPB 423PT/2020 EPI ISL 794759 2020-12-22  | GV B.1.177                                | 20E EU1                                       |
| swab_31                   | hCoV-19/Italy/APU-IZSPB-399PT/2020 EPI ISL 745193 2020-12-21  | GR B.1.1.7                                | 20I/501Y.V1                                   |

La Rosa et al. “Rapid screening for SARS-CoV-2 variants of concern in clinical and environmental samples using nested RT-PCR assays targeting key mutations of the Spike protein”

**Environmental samples**

| Sewage sample ID                              | WWTP ID                    | Sampling date |
|-----------------------------------------------|----------------------------|---------------|
| <b>Archive samples</b>                        |                            |               |
| 3702                                          | Rome Ostia                 | 26/09/2020    |
| 3714                                          | Rome East                  | 05/10/2020    |
| 3716                                          | Rome East                  | 14/10/2020    |
| 3720                                          | Rome South                 | 12/10/2020    |
| 3732                                          | Rome North                 | 26/10/2020    |
| 3737                                          | Rome East                  | 04/11/2020    |
| 3738                                          | Rome East                  | 04/11/2020    |
| 3739                                          | Rome East                  | 13/11/2020    |
| 3740                                          | Rome East                  | 13/11/2020    |
| 3742                                          | Rome Ostia                 | 11/11/2020    |
| 3744                                          | Rome East                  | 19/11/2020    |
| 3750                                          | Rome North                 | 11/11/2020    |
| 3797                                          | Rome East                  | 17/11/2020    |
| 3798                                          | Rome East                  | 17/11/2020    |
| 3801                                          | Rome East                  | 02/12/2020    |
| 3802                                          | Rome East                  | 02/12/2020    |
| 3805                                          | Rome East                  | 14/12/2020    |
| 3808                                          | Rome South                 | 12/12/2020    |
| 3809                                          | Rome Ostia                 | 11/12/2020    |
| 3815                                          | Rome South                 | 26/12/2020    |
| <b>Ad-hoc samples from outbreak locations</b> |                            |               |
| 3862                                          | Guardiagrele (CH), Abruzzo | 21/01/2021    |
| 3863                                          | Guardiagrele (CH), Abruzzo | 26/01/2021    |
| 3864                                          | Guardiagrele (CH), Abruzzo | 26/01/2021    |
| 3865                                          | Guardiagrele (CH), Abruzzo | 26/01/2021    |
| 3866                                          | Guardiagrele (CH), Abruzzo | 26/01/2021    |
| 3867                                          | Guardiagrele (CH), Abruzzo | 26/01/2021    |
| 3868                                          | Guardiagrele (CH), Abruzzo | 26/01/2021    |
| 3869                                          | Guardiagrele (CH), Abruzzo | 26/01/2021    |
| 3944                                          | Perugia, Umbria            | 05/02/2021    |
| 3945                                          | Perugia, Umbria            | 05/02/2021    |
| 3946                                          | Perugia, Umbria            | 06/02/2021    |
| 3947                                          | Perugia, Umbria            | 06/02/2021    |
| 3948                                          | Perugia, Umbria            | 08/02/2021    |
| 3949                                          | Perugia, Umbria            | 08/02/2021    |

La Rosa et al. "Rapid screening for SARS-CoV-2 variants of concern in clinical and environmental samples using nested RT-PCR assays targeting key mutations of the Spike protein"

**Primer used for sequencing the PCR fragment of PCR ID 980 (long nested assay)**

| <b>Primer ID</b> | <b>Sequence (5'-3')</b>    | <b>Positions *</b> | <b>Strand</b> |
|------------------|----------------------------|--------------------|---------------|
| 2321             | TTCAACTCAGGACTTGTTCTTACC   | 21709-21732        | forward       |
| 2322RevCom       | TTGGATGGAAAGTGAGTTCAGA     | 22036-22015        | forward       |
| 2323             | TTGTTTAGGAAGTCTAATCTCAAACC | 22925-22950        | forward       |
| 2320             | GCTGAGAGACATATTCAAAGTGCA   | 22082-22058        | reverse       |
| 2325RevCom       | GTGTGCTACCGCCTGATAG        | 22978-22997        | reverse       |
| 2326             | GTGGATCACGGACAGCATC        | 23300-23282        | reverse       |

\* Reference genome NC45512.2 (Wuhan)



La Rosa et al. “Rapid screening for SARS-CoV-2 variants of concern in clinical and environmental samples using nested RT-PCR assays targeting key mutations of the Spike protein”

**Geographic and temporal occurrence of variants detected in clinical samples using PCR ID 980**

| Sample                                                                                                                                  | Mutation map        | Mutation occurrence<br>(GISAID CoVsurver Mutation Analysis)                                                                                                                                                                                                                                                                      |
|-----------------------------------------------------------------------------------------------------------------------------------------|---------------------|----------------------------------------------------------------------------------------------------------------------------------------------------------------------------------------------------------------------------------------------------------------------------------------------------------------------------------|
| swab_1, swab_4,<br>swab_5, swab_6,<br>swab_7, swab_8,<br>swab_9, swab_10,<br>swab_11, swab_12,<br>swab_17, swab_20,<br>swab_29, swab_30 | A222V               | AA change Spike A222V already occurred 93796 times (23.50% of all samples with Spike sequence) in 58 countries. The first strain with this aa change, collected in February 2020, was hCoV-19/Iran/K1r-29/2020. The aa change most recently occurred in strain hCoV-19/England/SHEF-10CF750/2021, collected in January 2021.     |
| swab_2, swab_3,<br>swab_13, swab_16,<br>swab_23                                                                                         | S477N               | AA change Spike S477N already occurred 20280 times (5.57% of all samples with Spike sequence) in 42 countries. The first strain with this aa change, collected in March 2020, was hCoV-19/Australia/VIC2165/2020. The aa change most recently occurred in strain hCoV-19/Singapore/56/2021, collected in January 2021.           |
| swab_14, swab_15,<br>swab_25, swab_27,<br>swab_28                                                                                       | -                   | ///                                                                                                                                                                                                                                                                                                                              |
|                                                                                                                                         |                     | AA change Spike A222V already occurred 93796 times (23.50% of all samples with Spike sequence) in 58 countries. The first strain with this aa change, collected in February 2020, was hCoV-19/Iran/K1r-29/2020. The aa change most recently occurred in strain hCoV-19/England/SHEF-10CF750/2021, collected in January 2021.     |
| swab_18                                                                                                                                 | A222V, A262S, P272L | AA change Spike A262S already occurred 4248 times (1.17% of all samples with Spike sequence) in 32 countries. The first strain with this aa change, collected in February 2020, was hCoV-19/South Korea/KCDC2085/2020. The aa change most recently occurred in strain hCoV-19/England/210241211/2021, collected in January 2021. |
|                                                                                                                                         |                     | AA change Spike P272L already occurred 3181 times (0.87% of all samples with Spike sequence) in 26 countries. The first strain with this aa change, collected in March 2020, was hCoV-19/Australia/QLD1278/2020. The aa change most recently occurred in strain hCoV-19/England/210241211/2021, collected in January 2021.       |
| swab_19                                                                                                                                 | S98F                | AA change Spike S98F already occurred 4626 times (1.27% of all samples with Spike sequence) in 41 countries. The first strain with this aa change, collected in January 2020, was hCoV-19/Shanghai/SH0010/2020. The aa change                                                                                                    |

La Rosa et al. “Rapid screening for SARS-CoV-2 variants of concern in clinical and environmental samples using nested RT-PCR assays targeting key mutations of the Spike protein”

|         |                                                                                                                          |                                                                                                                                                                                                                                                                                                                                                                                                                                                                                                                                                                                                                                                           |
|---------|--------------------------------------------------------------------------------------------------------------------------|-----------------------------------------------------------------------------------------------------------------------------------------------------------------------------------------------------------------------------------------------------------------------------------------------------------------------------------------------------------------------------------------------------------------------------------------------------------------------------------------------------------------------------------------------------------------------------------------------------------------------------------------------------------|
|         |                                                                                                                          | most recently occurred in strain hCoV-19/Belgium/ULG-11273/2021, collected in January 2021.                                                                                                                                                                                                                                                                                                                                                                                                                                                                                                                                                               |
| swab_24 | A222V, A411S                                                                                                             | AA change Spike A222V already occurred 93796 times (23.50% of all samples with Spike sequence) in 58 countries. The first strain with this aa change, collected in February 2020, was hCoV-19/Iran/K1r-29/2020. The aa change most recently occurred in strain hCoV-19/England/SHEF-10CF750/2021, collected in January 2021.                                                                                                                                                                                                                                                                                                                              |
|         |                                                                                                                          | AA change Spike A411S already occurred 40 times (0.01% of all samples with Spike sequence) in 9 countries. The first strain with this aa change, collected in February 2020, was hCoV-19/Wuhan/HB-WH2-166/2020. The aa change most recently occurred in strain hCoV-19/England/QEUH-D513EC/2020, collected in December 2020.                                                                                                                                                                                                                                                                                                                              |
| swab_25 | Swab 25 provided a double electropherogram signal, one of which including a nine amino acid deletion: IHVSGTNGT 68-76del | N74del and T76del. Mutation Spike N74del and T76del removes a potential N-glycosylation site at position 74, which may also affect antigenic and other properties of this strain. In detail, the motif at positions 74-76 changed from NGT (glyco) to --- (no glyco).                                                                                                                                                                                                                                                                                                                                                                                     |
| swab_26 | D215H                                                                                                                    | AA change Spike D215H already occurred 1155 times (0.32% of all samples with Spike sequence) in 22 countries. The first strain with this aa change, collected in February 2020, was hCoV-19/Hangzhou/ZJU-010/2020. The aa change most recently occurred in strain hCoV-19/USA/NY-Wadsworth-21002030-01/2021, collected in January 2021.                                                                                                                                                                                                                                                                                                                   |
| swab_31 | H69del, V70del, Y144del, N501Y, A570D                                                                                    | AA change Spike N501Y already occurred 19062 times (5.23% of all samples with Spike sequence) in 45 countries. The first strain with this aa change, collected in April 2020, was hCoV-19/Brazil/PE-IAM19/2020. The aa change most recently occurred in strain hCoV-19/England/210260926/2021, collected in January 2021.<br>AA change Spike A570D already occurred 18023 times (4.95% of all samples with Spike sequence) in 42 countries. The first strain with this aa change, collected in April 2020, was hCoV-19/Italy/ABR-IZSGC-TE26533/2020. The aa change most recently occurred in strain hCoV-19/Singapore/48/2021, collected in January 2021. |
